# Supplementary material
Source: PubMed Central journal article supplement (PMC3196783)

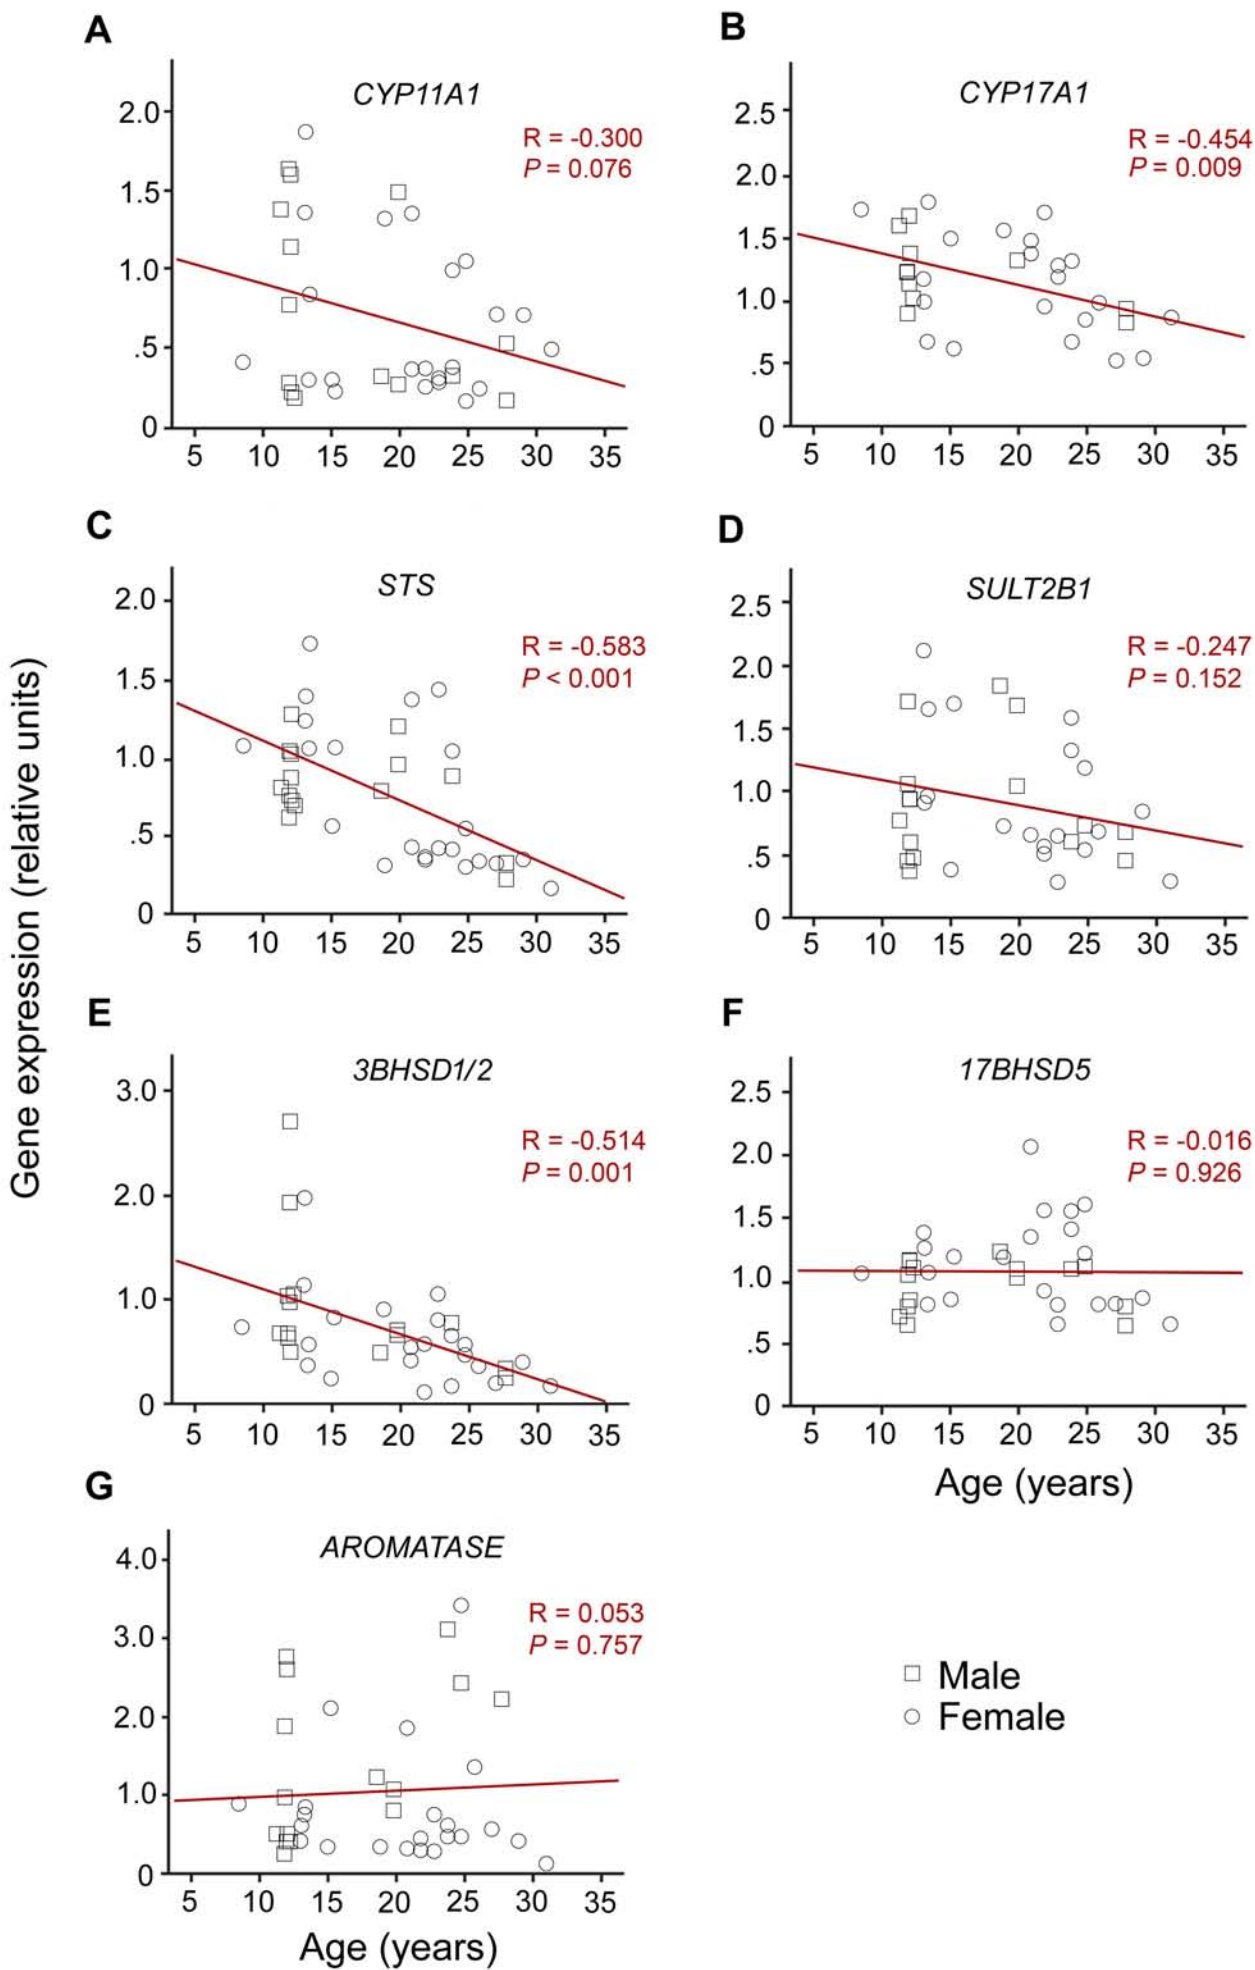

Supplement: NIHMS306333-supplement-01.pdf [file NIHMS306333-supplement-01.pdf]
